# Supplementary material
Source: ML conference proceedings conference paper supplement (https://proceedings.neurips.cc/paper_files/paper/2022/hash/f376f5dff6f6ec6364aea7a46ab49574-Abstract.html)
Supplement: Supplementary file 1 [file f376f5dff6f6ec6364aea7a46ab49574-Supplemental-Conference.zip]

Archive with 1 entries (1 files):
- Appendix_Skill_Regularized_Task_Decomposition_for_Multi_task_Offline_Reinforcement_Learning.pdf
